# Supplementary material for: Emergency department characteristics and capabilities in Bogotá, Colombia
Source: Springer Nature journal article supplement (doi:10.1186/s12245-015-0079-y), 2015-08-07
Supplement: MOESM1 [file 9735796]

## International Emergency Department Survey

The NEDI project is conducted by the Emergency Medicine Network (EMNet), an emergency medicine research group, to better understand the characteristics and scope of Emergency Departments (EDs) internationally.

Since unplanned medical problems affect people worldwide, NEDI aspires to describe emergency healthcare systems around the world. The NEDI online survey identifies similarities and differences in EDs with a philosophy that different emergency healthcare systems can learn from one another. Using technology to facilitate cooperation, we hope that NEDI will serve as a platform for exchanging ideas on improving the accessibility and quality of emergency care for all.

If you work clinically in an ED, please proceed with the survey.

Are you willing to provide descriptive information about your Emergency Department?

- Yes  
 No

→ If NO, please save this survey and return to it when you are ready to fill it out. Thank you for your time.

Please answer the following questions with estimates for the year 2011 (unless otherwise indicated).

1. Is your ED physically part of a hospital (e.g. same building or adjacent):

- Yes       No

→ If no, please specify the physical location or structure of the ED (e.g. urgent care center, mother and child center, community health center): \_\_\_\_\_

2. Please estimate the total number of hospital beds; enter 999999 if unknown: \_\_\_\_\_

3. Please estimate the percent of your patients that are children; enter 999999 if unknown: \_\_\_\_\_

4. Is the physical plant of your ED:

**Contiguous** – all medical (e.g. heart attack, acute asthma) and surgical (e.g. trauma) emergency care provided by a general ED in one unified area.

OR

**Non-contiguous** – emergency care provided in separate areas throughout the hospital; i.e. medical emergency care (e.g. heart attack, acute asthma) provided in a geographically distinct area from surgical emergency care (e.g. trauma).

5. Is there a triage to service (i.e. triage of patients to a specific emergency service, e.g. medical vs. surgical team)?

- Yes       No

6. Please, indicate the total number of ED beds, enter 999999 if unknown: \_\_\_\_\_

7a. In 2011, was your ED open 24 hours/day, 7 days/week?

Yes       No

7b. Who runs the emergency department?

- ED director who oversees all emergency services (e.g. medicine and surgery)  
 Each service has its own director, however, they jointly oversee the emergency department (e.g. have board meetings).  
 Emergency services share the same hospital area but are otherwise completely independent of one another, each with its own leadership.  
 Other, please specify: \_\_\_\_\_

8. Please indicate whether the following types of emergencies can be treated in your ED and whether treatment is available 24/7:

|                                                                                                | No                       | Yes                      | Not Available 24/7       | Available 24/7           |
|------------------------------------------------------------------------------------------------|--------------------------|--------------------------|--------------------------|--------------------------|
| a. Medical- Cardiology (e.g., arrhythmia, acute myocardial infarction)                         | <input type="checkbox"/> | <input type="checkbox"/> | <input type="checkbox"/> | <input type="checkbox"/> |
| b. Medical- Oncology (e.g., fever and neutropenia)                                             | <input type="checkbox"/> | <input type="checkbox"/> | <input type="checkbox"/> | <input type="checkbox"/> |
| c. Medical- Other (e.g., urinary tract infection, acute asthma)                                | <input type="checkbox"/> | <input type="checkbox"/> | <input type="checkbox"/> | <input type="checkbox"/> |
| d. Trauma (e.g., motor vehicle crash, gun shot wound)                                          | <input type="checkbox"/> | <input type="checkbox"/> | <input type="checkbox"/> | <input type="checkbox"/> |
| e. Neurological and neurosurgical (e.g., acute thromboembolic stroke, intracranial hemorrhage) | <input type="checkbox"/> | <input type="checkbox"/> | <input type="checkbox"/> | <input type="checkbox"/> |
| f. Urological (e.g., kidney stone)                                                             | <input type="checkbox"/> | <input type="checkbox"/> | <input type="checkbox"/> | <input type="checkbox"/> |
| g. Obstetrical (e.g., complications of pregnancy)                                              | <input type="checkbox"/> | <input type="checkbox"/> | <input type="checkbox"/> | <input type="checkbox"/> |
| h. Gynecological (e.g., ruptured ovarian cyst, yeast infection)                                | <input type="checkbox"/> | <input type="checkbox"/> | <input type="checkbox"/> | <input type="checkbox"/> |
| i. Ear, Nose, Throat (e.g., severe epistaxis)                                                  | <input type="checkbox"/> | <input type="checkbox"/> | <input type="checkbox"/> | <input type="checkbox"/> |
| j. Ophthalmological (e.g., acute glaucoma, eye injury)                                         | <input type="checkbox"/> | <input type="checkbox"/> | <input type="checkbox"/> | <input type="checkbox"/> |
| k. Toxicological (e.g., overdose, carbon monoxide poisoning)                                   | <input type="checkbox"/> | <input type="checkbox"/> | <input type="checkbox"/> | <input type="checkbox"/> |
| l. Psychiatric (e.g., psychosis)                                                               | <input type="checkbox"/> | <input type="checkbox"/> | <input type="checkbox"/> | <input type="checkbox"/> |
| m. Dental (e.g., tooth extraction)                                                             | <input type="checkbox"/> | <input type="checkbox"/> | <input type="checkbox"/> | <input type="checkbox"/> |
| n. Surgical- Oral maxillofacial (e.g., jaw fractures, oral abscesses)                          | <input type="checkbox"/> | <input type="checkbox"/> | <input type="checkbox"/> | <input type="checkbox"/> |
| o. Surgical- Plastic (e.g., severe lip laceration)                                             | <input type="checkbox"/> | <input type="checkbox"/> | <input type="checkbox"/> | <input type="checkbox"/> |
| p. Surgical- Hand (e.g., tendon injury)                                                        | <input type="checkbox"/> | <input type="checkbox"/> | <input type="checkbox"/> | <input type="checkbox"/> |
| q. Surgical- Orthopedic (e.g., long bone fractures)                                            | <input type="checkbox"/> | <input type="checkbox"/> | <input type="checkbox"/> | <input type="checkbox"/> |

|                                                               |                          |                          |                          |                          |
|---------------------------------------------------------------|--------------------------|--------------------------|--------------------------|--------------------------|
| r. Surgical- General (e.g., acute appendicitis, pneumothorax) | <input type="checkbox"/> | <input type="checkbox"/> | <input type="checkbox"/> | <input type="checkbox"/> |
|---------------------------------------------------------------|--------------------------|--------------------------|--------------------------|--------------------------|

9. Please indicate the annual number of patient visits at your ED in 2011:

Children (e.g. ages 0-17) = \_\_\_\_\_  Unknown  
 Adults (e.g. ages 18+) = \_\_\_\_\_  Unknown  


---

 Total (Adults + Children) = \_\_\_\_\_  Unknown

If your ED uses a different cut off age to distinguish between children and adults, please specify: \_\_\_\_\_ years

10. Approximate percent of patients that arrived at your ED by ambulance:

- < 20%
- 20 – 39%
- 40 – 59%
- > 60 – 79%
- 80% or higher
- Unknown

11. Do patients require a referral from a physician, or need to arrive by ambulance, in order to receive emergency care? (i.e., with rare exceptions, patients without a referral are not seen)

- Yes  No

12. What is the average length of stay at your ED?

- < 1 hour
- 1-6 hours
- > 6 hours

13a. Is a physician available to the ED, 24 hours/day, 7 days/week?

- Yes—A physician is physically present in the ED, 24/7
- Yes—A physician is available to the ED from within the hospital, 24/7
- No—Variable staffing (e.g., a physician is available to the ED from outside the hospital)

13b. Is at least one nurse on duty in the ED, 24 hours/day, 7 days/week?

- Yes  No

14. Are the following consultants available in-person to the ED? Residents or registrars qualify. If YES, please indicate, on average, how long it takes the consultant to arrive and whether the consultant is available 24/7:

|                     | No                       | Yes<br>0-29<br>min       | Yes<br>30-59<br>min      | Yes<br>≥60<br>min        | Not<br>available<br>24/7 | Available<br>24/7        |
|---------------------|--------------------------|--------------------------|--------------------------|--------------------------|--------------------------|--------------------------|
| a. Anesthesiologist | <input type="checkbox"/> | <input type="checkbox"/> | <input type="checkbox"/> | <input type="checkbox"/> | <input type="checkbox"/> | <input type="checkbox"/> |
| b. Cardiologist     | <input type="checkbox"/> | <input type="checkbox"/> | <input type="checkbox"/> | <input type="checkbox"/> | <input type="checkbox"/> | <input type="checkbox"/> |

|                              |                          |                          |                          |                          |                          |                          |
|------------------------------|--------------------------|--------------------------|--------------------------|--------------------------|--------------------------|--------------------------|
| c. General Surgeon           | <input type="checkbox"/> | <input type="checkbox"/> | <input type="checkbox"/> | <input type="checkbox"/> | <input type="checkbox"/> | <input type="checkbox"/> |
| d. Neurologist               | <input type="checkbox"/> | <input type="checkbox"/> | <input type="checkbox"/> | <input type="checkbox"/> | <input type="checkbox"/> | <input type="checkbox"/> |
| e. Neurosurgeon              | <input type="checkbox"/> | <input type="checkbox"/> | <input type="checkbox"/> | <input type="checkbox"/> | <input type="checkbox"/> | <input type="checkbox"/> |
| f. Obstetrician-Gynecologist | <input type="checkbox"/> | <input type="checkbox"/> | <input type="checkbox"/> | <input type="checkbox"/> | <input type="checkbox"/> | <input type="checkbox"/> |
| g. Orthopedic Surgeon        | <input type="checkbox"/> | <input type="checkbox"/> | <input type="checkbox"/> | <input type="checkbox"/> | <input type="checkbox"/> | <input type="checkbox"/> |
| h. Plastic Surgeon           | <input type="checkbox"/> | <input type="checkbox"/> | <input type="checkbox"/> | <input type="checkbox"/> | <input type="checkbox"/> | <input type="checkbox"/> |
| i. Psychiatrist              | <input type="checkbox"/> | <input type="checkbox"/> | <input type="checkbox"/> | <input type="checkbox"/> | <input type="checkbox"/> | <input type="checkbox"/> |

15. In 2011, how would you describe your hospital's ED?

- Under capacity
- Good balance
- At capacity
- Over capacity

16. Please respond "yes" or "no" in reference to the following questions:

|                                                                                                                   | No                       | Yes                      |
|-------------------------------------------------------------------------------------------------------------------|--------------------------|--------------------------|
| a. Is there a dedicated CT scanner for the ED (i.e. preferentially for ED patients)?                              | <input type="checkbox"/> | <input type="checkbox"/> |
| b. Is there a cardiac monitor available immediately in the ED?                                                    | <input type="checkbox"/> | <input type="checkbox"/> |
| c. Is there a mechanical ventilator available immediately in the ED?                                              | <input type="checkbox"/> | <input type="checkbox"/> |
| d. Is there a respiratory isolation (negative pressure) room available in the ED?                                 | <input type="checkbox"/> | <input type="checkbox"/> |
| e. Is a computer system used to collect clinical data in the ED?                                                  | <input type="checkbox"/> | <input type="checkbox"/> |
| f. Is internet access available in the clinical area of the ED?                                                   | <input type="checkbox"/> | <input type="checkbox"/> |
| g. Is there a clinical laboratory available for your ED with the capacity to perform a potassium blood test 24/7? | <input type="checkbox"/> | <input type="checkbox"/> |

17a. Approximate percent of your hospital's total admissions (i.e. inpatient hospitalizations) that were admitted through the ED:

- < 20%
- 20 – 39%
- 40 – 59%
- 60 – 79%
- 80 or higher
- Unknown
- Question does not apply; ED is not part of the hospital

17b. Approximate percent of ED visits that led to admission (i.e. inpatient hospitalization), including patients admitted to observation unit/status (*in some facilities, a short-stay in the "observation unit" or an admission is designated as "observation status" if the length of stay is < 24 hours*):

- < 20%
- 20 – 39%
- 40 – 59%
- 60 – 79%

- 80 or higher
- Unknown
- Question does not apply; ED is not part of the hospital

18. Is the ED an official department within the hospital organization (e.g. separate and independent from the Departments of Medicine or Surgery)?

- Yes       No

→ If NO, ED is part of which department (specify): \_\_\_\_\_

Please include any comments that would help us understand your survey responses. (e.g., if your ED serves a specific patient population or is a specialty ED):

Thank you for taking the time to complete this questionnaire!

## Encuesta Internacional de Departamentos de Emergencias

El proyecto NEDI es conducido por la Red de Medicina de Emergencias (EMNet, grupo de investigación en Medicina de Emergencias), conformado para entender mejor las características y alcances de los Departamentos de Emergencias (DE, equivalente a Servicios de Urgencias) a nivel internacional.

Ya que los problemas médicos inesperados afectan a las personas en todos los países, NEDI pretende describir los diferentes sistemas de emergencias en salud alrededor del mundo. La encuesta NEDI en línea identifica similitudes y diferencias en los DE siguiendo como filosofía en que los sistemas de emergencias en salud puedan aprender unos de otros. Usando la tecnología para facilitar la cooperación, esperamos que NEDI sirva como una plataforma de intercambio de ideas para mejorar la accesibilidad y calidad de la atención de emergencias para todos.

Si usted trabaja como clínico en un DE, por favor continúe con la encuesta.

¿Está dispuesto a proporcionar información descriptiva sobre su Departamento de Emergencias (Urgencias)?

- Sí  
 No

→ Si la respuesta es NO, por favor guarde esta encuesta y regrese a ella cuando se encuentre listo para completarla. Gracias por su tiempo.

Por favor responda las siguientes preguntas con los estimados para el año 2011 (a menos que se indique algo distinto).

**1. ¿Está su DE físicamente en un hospital (por ej. En el mismo edificio o adyacente):**

- Sí  
 No

→ Si la respuesta es NO, por favor especifique la ubicación o estructura del DE (por ej. En un Centro Materno-Infantil, en un Centro de Salud independiente): \_\_\_\_\_

**2. Especifique el número total de camas de su hospital (ingrese 999999 si se desconoce):** \_\_\_\_\_

**3. ¿Cuál es el porcentaje de pacientes pediátricos en su servicio? (ingrese 999999 si se desconoce)**

\_\_\_\_\_

**4. La planta física de su DE está:**

**Contigua** – toda la atención de urgencias médicas (por ej. infarto agudo al miocardio, asma agudo) y quirúrgicas (por ej. trauma) son proporcionadas por un DE general en un área unificada.

Ó

**No-contigua** – la atención de urgencias es proporcionada en áreas separadas en el hospital; ej. la atención de urgencias médicas (por ej. infarto agudo al miocardio, asma agudo) es proporcionada en un área separada geográficamente de la atención de urgencias quirúrgicas

**5. ¿Existe un sistema de triage por servicio? (ej. Se realiza un triage de los pacientes a un servicio específico, Cirugía vs. Medicina)**

- Sí                       No

**6. Por favor indique el número total de camas en el DE (ingrese 999999 si se desconoce): \_\_\_\_\_**

**7a. En el 2011, ¿estuvo su DE abierto las 24 horas del día, 7 días a la semana?**

Sí  No

**7b. ¿Quién dirige el departamento de urgencias?**

- Un director de urgencias supervisa todas las urgencias (ej. médicas y quirúrgicas)  
 Cada servicio tiene su propio director, sin embargo ellos en conjunto supervisan el departamento de urgencias (ej. mediante reuniones de la junta).  
 El servicio de urgencias comparte la misma área del hospital, pero son completamente independientes la una de la otra, cada una con su propio líder.  
 Otro, por favor especifique: \_\_\_\_\_

**8. Por favor indique si los siguientes tipos de urgencias pueden ser tratadas en su DE. También indique si el tratamiento está disponible 24/7:**

|                                                                                       | No                       | Sí                       | No Disponible 24/7       | Disponible 24/7          |
|---------------------------------------------------------------------------------------|--------------------------|--------------------------|--------------------------|--------------------------|
| a. Médicas – Cardiología (por ej. Arritmia, infarto agudo al miocardio )              | <input type="checkbox"/> | <input type="checkbox"/> | <input type="checkbox"/> | <input type="checkbox"/> |
| b. Médicas – Oncología (por ej. Fiebre y neutropenia)                                 | <input type="checkbox"/> | <input type="checkbox"/> | <input type="checkbox"/> | <input type="checkbox"/> |
| c. Médicas – Otros (por ej. Infección del tracto urinario, asma agudo)                | <input type="checkbox"/> | <input type="checkbox"/> | <input type="checkbox"/> | <input type="checkbox"/> |
| d. Trauma (por ej. Accidente automovilístico, herida por arma de fuego)               | <input type="checkbox"/> | <input type="checkbox"/> | <input type="checkbox"/> | <input type="checkbox"/> |
| e. Neurológicas y neurocirugía (por ej. Tromboembolia aguda, hemorragia intracraneal) | <input type="checkbox"/> | <input type="checkbox"/> | <input type="checkbox"/> | <input type="checkbox"/> |
| f. Urológicas (por ej. Urolitiasis)                                                   | <input type="checkbox"/> | <input type="checkbox"/> | <input type="checkbox"/> | <input type="checkbox"/> |
| g. Obstétricas (por ej. Complicaciones del embarazo)                                  | <input type="checkbox"/> | <input type="checkbox"/> | <input type="checkbox"/> | <input type="checkbox"/> |
| h. Ginecológicas (por ej. Quiste ovárico perforado, candidiasis vaginal)              | <input type="checkbox"/> | <input type="checkbox"/> | <input type="checkbox"/> | <input type="checkbox"/> |
| i. Oído, Nariz, Garganta (por ej. Epistaxis severa)                                   | <input type="checkbox"/> | <input type="checkbox"/> | <input type="checkbox"/> | <input type="checkbox"/> |
| j. Oftalmológicas (por ej. Glaucoma agudo, herida de ojo)                             | <input type="checkbox"/> | <input type="checkbox"/> | <input type="checkbox"/> | <input type="checkbox"/> |
| k. Toxicológicas (por ej. sobredosis, envenenamiento por monóxido)                    | <input type="checkbox"/> | <input type="checkbox"/> | <input type="checkbox"/> | <input type="checkbox"/> |
| l. Psiquiátricas (por ej. Psicosis)                                                   | <input type="checkbox"/> | <input type="checkbox"/> | <input type="checkbox"/> | <input type="checkbox"/> |
| m. Dentales (por ej. Extracción de dientes)                                           | <input type="checkbox"/> | <input type="checkbox"/> | <input type="checkbox"/> | <input type="checkbox"/> |
| n. Cirugía – maxilofacial oral (por ej. Fractura de mandíbula, abscesos bucales)      | <input type="checkbox"/> | <input type="checkbox"/> | <input type="checkbox"/> | <input type="checkbox"/> |
| o. Cirugía – Plástica (por ej. Laceración severa de labios)                           | <input type="checkbox"/> | <input type="checkbox"/> | <input type="checkbox"/> | <input type="checkbox"/> |

|                                                              |                          |                          |                          |                          |
|--------------------------------------------------------------|--------------------------|--------------------------|--------------------------|--------------------------|
| p. Cirugía – Mano (por ej. Herida de tendón)                 | <input type="checkbox"/> | <input type="checkbox"/> | <input type="checkbox"/> | <input type="checkbox"/> |
| q. Cirugía – Ortopédica (por ej. Fractura de huesos largos)  | <input type="checkbox"/> | <input type="checkbox"/> | <input type="checkbox"/> | <input type="checkbox"/> |
| r. Cirugía – General (por ej. Apendicitis aguda, neumotórax) | <input type="checkbox"/> | <input type="checkbox"/> | <input type="checkbox"/> | <input type="checkbox"/> |

**9. Por favor indique el número anual de visitas de pacientes a su DE durante el 2011 (ingrese 999999 si se desconoce):**

Niños (por ej. Edades 0-17) = \_\_\_\_\_  Desconocido  
 + Adultos (por ej. Edades 18+) = \_\_\_\_\_  Desconocido  
 Total (Niños + Adultos) = \_\_\_\_\_  Desconocido

Si su DE usa una edad límite diferente para distinguir entre niños y adultos, por favor especifíquela:  
 \_\_\_\_\_ años

**10. Porcentaje aproximado de pacientes que llegaron al DE en ambulancia:**

- < 20%
- 20 – 39%
- 40 – 59%
- 60 – 79%
- 80% o más
- Desconocido

**11. ¿Requieren los pacientes ser referidos por un médico, o requieren llegar en una ambulancia, para poder recibir la atención de urgencias?** (por ej. con excepciones raras, los pacientes sin una referencia no son atendidos)

- Sí  No

**12. ¿Cuál es el tiempo promedio que permanecen los pacientes en el área de su DE?**

- < 1 hora
- 1-6 horas
- > 6 horas

**13a. ¿Hay un médico disponible en el DE, 24 horas al día, 7 días a la semana?**

- Sí—Hay un médico presente físicamente en el DE, 24/7
- Sí—Hay un médico disponible para el DE dentro del hospital, 24/7
- No—Personal variable (por ej. un médico está disponible para el DE fuera del hospital)

**13b. ¿Hay por lo menos una enfermera de turno en el DE, 24 horas al día, 7 días a la semana?**

- Sí  No

**14. ¿Están los siguientes especialistas para interconsulta disponibles en persona para el DE? Los residentes o médicos en formación califican. Si la respuesta es SI, por favor indique, en promedio, cuánto tiempo le toma al interconsultante llegar y si éste está disponible 24/7:**

|  |    |            |             |           |                  |                    |
|--|----|------------|-------------|-----------|------------------|--------------------|
|  | No | Sí<br>0-29 | Sí<br>30-59 | Sí<br>≥60 | No<br>Disponible | Disponible<br>24/7 |
|--|----|------------|-------------|-----------|------------------|--------------------|



|                        |                          | min                      | min                      | min                      | 24/7                     |                          |
|------------------------|--------------------------|--------------------------|--------------------------|--------------------------|--------------------------|--------------------------|
| a. Anestesiólogo       | <input type="checkbox"/> | <input type="checkbox"/> | <input type="checkbox"/> | <input type="checkbox"/> | <input type="checkbox"/> | <input type="checkbox"/> |
| b. Cardiólogo          | <input type="checkbox"/> | <input type="checkbox"/> | <input type="checkbox"/> | <input type="checkbox"/> | <input type="checkbox"/> | <input type="checkbox"/> |
| c. Cirujano General    | <input type="checkbox"/> | <input type="checkbox"/> | <input type="checkbox"/> | <input type="checkbox"/> | <input type="checkbox"/> | <input type="checkbox"/> |
| d. Neurólogo           | <input type="checkbox"/> | <input type="checkbox"/> | <input type="checkbox"/> | <input type="checkbox"/> | <input type="checkbox"/> | <input type="checkbox"/> |
| e. Neurocirujano       | <input type="checkbox"/> | <input type="checkbox"/> | <input type="checkbox"/> | <input type="checkbox"/> | <input type="checkbox"/> | <input type="checkbox"/> |
| f. Obstetra-Ginecólogo | <input type="checkbox"/> | <input type="checkbox"/> | <input type="checkbox"/> | <input type="checkbox"/> | <input type="checkbox"/> | <input type="checkbox"/> |
| g. Cirujano Ortopédico | <input type="checkbox"/> | <input type="checkbox"/> | <input type="checkbox"/> | <input type="checkbox"/> | <input type="checkbox"/> | <input type="checkbox"/> |
| h. Cirujano Plástico   | <input type="checkbox"/> | <input type="checkbox"/> | <input type="checkbox"/> | <input type="checkbox"/> | <input type="checkbox"/> | <input type="checkbox"/> |
| i. Psiquiatra          | <input type="checkbox"/> | <input type="checkbox"/> | <input type="checkbox"/> | <input type="checkbox"/> | <input type="checkbox"/> | <input type="checkbox"/> |

**15. En el 2011, ¿cómo describiría el DE del hospital?**

- Por debajo de la capacidad  
 Buen balance  
 En la capacidad  
 Por encima de la capacidad

**16. Por favor responda “sí” o “no” a las siguientes preguntas:**

|                                                                                                                         | No                       | Sí                       |
|-------------------------------------------------------------------------------------------------------------------------|--------------------------|--------------------------|
| a. ¿Hay un Tomógrafo dedicado al DE? (disponible preferencialmente para los pacientes del DE)                           | <input type="checkbox"/> | <input type="checkbox"/> |
| b. ¿Hay un monitor cardiaco disponible inmediatamente en el DE?                                                         | <input type="checkbox"/> | <input type="checkbox"/> |
| c. ¿Hay un respirador mecánico disponible inmediatamente en el DE?                                                      | <input type="checkbox"/> | <input type="checkbox"/> |
| d. ¿Hay una sala de aislamiento respiratorio (presión negativa) disponible en el DE?                                    | <input type="checkbox"/> | <input type="checkbox"/> |
| e. ¿Es utilizado un sistema computarizado para recoger datos clínicos en el DE?                                         | <input type="checkbox"/> | <input type="checkbox"/> |
| f. ¿Existe acceso a internet en el área clínica de su DE?                                                               | <input type="checkbox"/> | <input type="checkbox"/> |
| g. ¿Existe un laboratorio de análisis clínicos disponible para su DE con la capacidad de medir niveles de Potasio 24/7? | <input type="checkbox"/> | <input type="checkbox"/> |

**17a. Porcentaje aproximado del total de admisiones del hospital (por ej. Hospitalizaciones) que fueron admitidas a través del DE:**

- < 20%  
 20 – 39%  
 40 – 59%  
 60 – 79%  
 80% o más  
 Desconocido  
 No se aplica; el DE no es parte de un hospital

**17b. Porcentaje aproximado de visitas de emergencia al DE que terminan con admisión al hospital (por ej. hospitalización) incluyendo pacientes ingresados a la unidad de observación o en estado de observación (En algunas instalaciones, una estadía corta en la “unidad de observación” o una admisión es clasificada como “estado de observación” si la estadía es menor a 24 horas):**

- < 20%
- 20 – 39%
- 40 – 59%
- 60 – 79%
- 80% o más
- Desconocido
- No se aplica; el DE no es parte de un hospital

**18. ¿Es el DE un departamento oficial dentro de la organización del hospital (por ej. independiente y separado de los Departamentos de Medicina o Cirugía)?**

- Sí       No

→ Si la respuesta es NO, el DE es parte de qué departamento(s) (especifique): \_\_\_\_\_

**Por favor indique algún comentario que nos podría ayudar a entender las respuestas de su encuesta.** (por ej. Si su DE atiende a una población específica de pacientes o es un DE de especialidad):

**¡Gracias por tomar el tiempo para completar este cuestionario!**
